# Supplementary material for: Energetic MOF-derived Fe3C nanoparticles encased in N,S-codoped mesoporous pod-like carbon nanotubes for efficient oxygen reduction reaction
Source: Royal Society of Chemistry journal article supplement (doi:10.1039/d4nr04004j), 2024-12-18
Supplement: d4nr04004j1.pdf [file d4nr04004j1.pdf]

Electronic Supplementary Material (ESI) for Nanoscale.  
This journal is © The Royal Society of Chemistry 2024

## Supplementary Information

### **Energetic MOF-derived Fe<sub>3</sub>C nanoparticles encased in N, S-codoped mesoporous pod-like carbon nanotubes for efficient oxygen reduction reaction**

Yang Liu, Xinde Duan, Fayuan Ge, Tingting Wu and Hegen Zheng\*

*State Key Laboratory of Coordination Chemistry, School of Chemistry and Chemical Engineering, Collaborative Innovation Center of Advanced Microstructures, Nanjing University, Nanjing 210023, P. R. China.*

\*Corresponding authors. *E-mail: zhenghg@nju.edu.cn (H. Zheng).*

## Experimental section

All chemicals were used as received from commercial sources. ligand 4, 4'-bis(4-pyridyl)tetrazine (bptz) was synthesized following a reported procedure.<sup>S1</sup>

### *Material Characterization*

Powder X-ray diffraction (PXRD) patterns were recorded on a Bruker D8 Advance X-ray diffractometer using Cu K $\alpha$  radiation ( $\lambda = 1.5406 \text{ \AA}$ ). Thermogravimetric analysis (TGA) was performed on a STA449F3 thermogravimetric analyzer at a heating rate of  $10^\circ\text{C min}^{-1}$  under N<sub>2</sub> gas flow. Raman spectra were recorded on a Invia Raman spectrometer using a 633 nm laser. Brunauer-Emmett-Teller (BET) specific surface areas were measured by N<sub>2</sub> physisorption on a Micromeritics ASAP 2050 system. Scanning electron microscope (SEM) was carried on a S-4800. Transmission electron microscope (TEM), high-resolution transmission electron microscope (HR-TEM), scanning transmission electron microscope (STEM) and elemental mapping were all collected on a JEOL JEM-2800 microscope. X-ray photoelectron spectra (XPS) analysis was carried out on a PHI-5000 Versa Probe XPS system. Inductively coupled plasma atomic emission spectrometry (ICP-AES) was measured on PerkinElmer Avio500 atomic emission spectrometer.

### *Electrochemical measurements*

The ORR activity was evaluated by an electrochemical workstation (CHI 760E, Shanghai, Chenghua) in a standard three-electrode setup in 0.1 M KOH. A rotating disk electrode (RDE) can be used as the working electrode, Hg/Hg<sub>2</sub>Cl<sub>2</sub> (KCl saturated) electrode and platinum electrode can serve as the reference electrode and counter electrode, respectively. All measured potentials are converted to reversible hydrogen electrode potential ( $E_{\text{RHE}}$ ) using following Nernst equation:  $E_{\text{RHE}} = E_{\text{Hg}_2\text{Cl}_2} + 0.2415 + 0.059\text{pH}$ . The catalyst ink was prepared by ultrasonically dispersing the mixture of catalyst (5 mg), ethanol/H<sub>2</sub>O solution (960  $\mu\text{L}$ , 1/1, V/V), and Nafion (5 wt%, 40  $\mu\text{L}$ ) for 30 min. The catalyst dispersion (10  $\mu\text{L}$ ) was uniformly dropped onto a glassy carbon RDE (4 mm in diameter) and dried at room temperature.

Cyclic voltammograms (CV) measurements were performed at a scan rate of  $10 \text{ mV s}^{-1}$  in O<sub>2</sub>- and N<sub>2</sub>-saturated 0.1 M KOH solution, respectively. Linear sweeping

voltammetry (LSV) was tested in O<sub>2</sub>-saturated 0.1 M KOH at a rotating rate ranging from 400 to 1600 rpm with a scan rate of 10 mV s<sup>-1</sup>. The Tafel curve, derived from the LSV data, was represented by the equation  $\eta = a + b \times \log(j)$ . In this equation,  $\eta$  stands for overpotential,  $b$  signifies the Tafel slope, and  $a$  indicates the intercept. The stability test was carried out by current versus time (i-t) chronoamperometric response at the half-wave potential ( $E_{1/2}$ ) for 30000 s. The electrochemical surface areas (ECSA) can be estimated according to the double-layer capacitance ( $C_{dl}$ ) values by recording cyclic voltammetry (CV) curves at different scan rates of 20, 40, 60, 80, 100, mV s<sup>-1</sup> from 0.95 to 1.05 V (vs. RHE).

Rotating ring-disk electrode (RRDE) measurement was performed to further verify electron transfer number ( $n$ ) and the production of peroxide yields (HO<sub>2</sub><sup>-</sup>%) via following equations (Eq. S1- S2):

$$n = 4 \times \frac{I_d}{I_d + I_r/N} \quad (\text{Eq. S1})$$

$$HO_2^- \% = 200 \times \frac{I_r/N}{I_d + I_r/N} \quad (\text{Eq. S2})$$

Where  $I_d$  and  $I_r$  represent disk and ring current, respectively, and  $N$  represents the collection efficiency of the Pt ring (0.37).

### *Catalytic mechanism*

#### Reaction mechanism of ORR in alkaline media

| Reaction | Overall reaction                              | Reaction mechanism                                       |
|----------|-----------------------------------------------|----------------------------------------------------------|
| ORR      | $O_2 + 2H_2O(l) + 4e^- \rightarrow 4OH^-(aq)$ | $* + O_2(g) + H_2O(l) + e^- \rightarrow HOO* + OH^-(aq)$ |
|          |                                               | $HOO* + e^- \rightarrow O* + OH^-$                       |
|          |                                               | $O* + H_2O(l) + e^- \rightarrow HO* + OH^-(aq)$          |
|          |                                               | $HO* + e^- \rightarrow OH^-(aq) + *$                     |

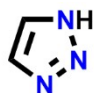

**1H-1,2,3-triazole**  
(N%: 60.84)

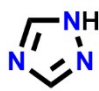

**1H-1,2,4-triazole**  
(N%: 60.84)

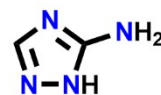

**5-amino-1H-1,2,4-triazole**  
(N%: 66.63)

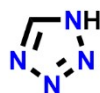

**1H-tetrazole**  
(N%: 79.98)

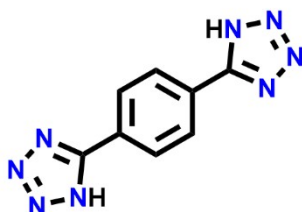

**5,5'-(1,4-Phenylene)bis(1H-tetrazole)**  
(N%: 52.32)

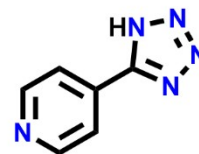

**4-(1H-tetrazol-5-yl)pyridine**  
(N%: 47.60)

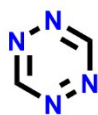

**1,2,4,5-tetrazine**  
(N%: 68.27)

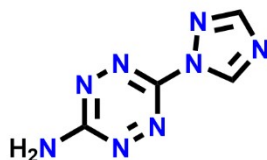

**3-amino-6-(1,2,4-triazol-1-yl)-  
1,2,4,5-tetrazine**  
(N%:68.27)

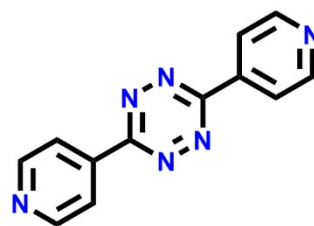

**4, 4'-bis(4-pyridyl)tetrazine**  
(N%: 35.58)

**Scheme S1** Some examples of triazole, tetrazole and tetrazine and their derivatives.

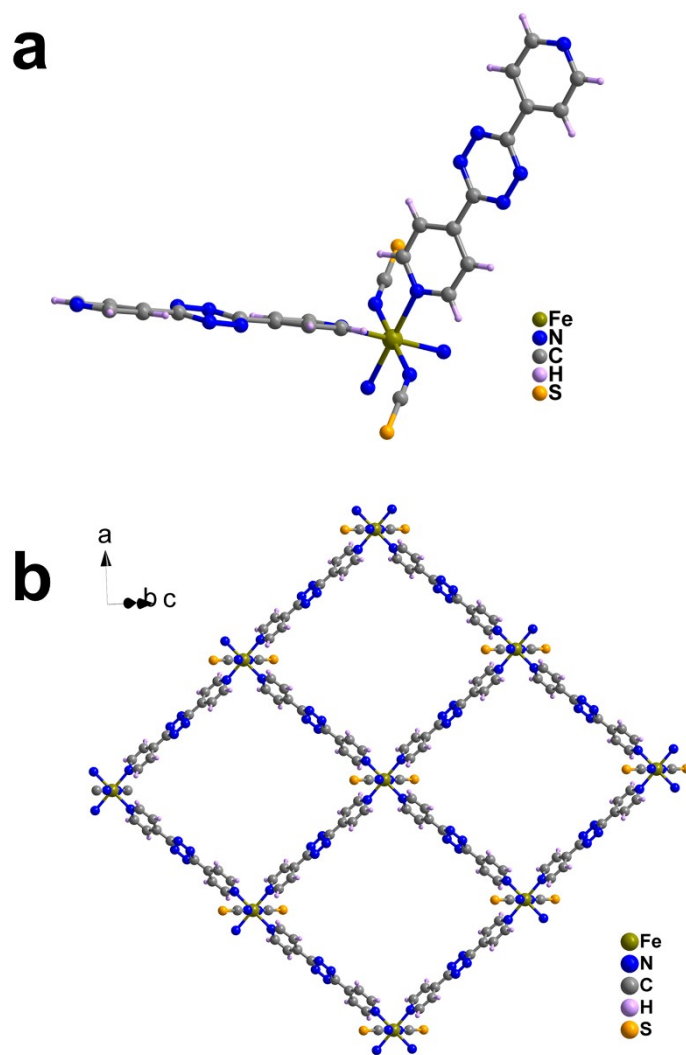

**Fig. S1** (a) The asymmetric unit and (b) 2D network structure of Fe-EMOF.

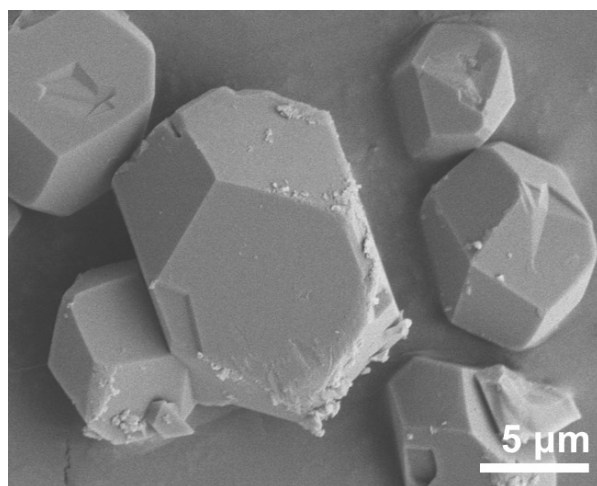

**Fig. S2** SEM image of Fe-EMOF.

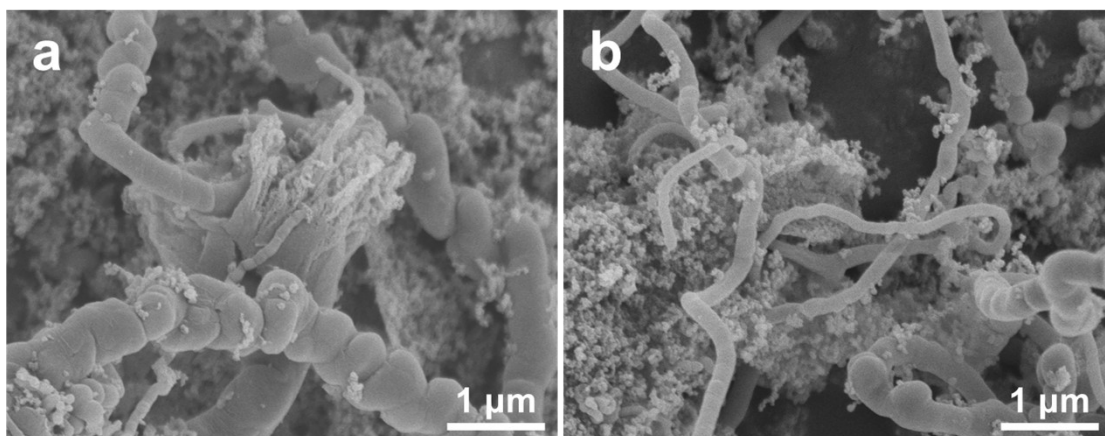

**Fig. S3** SEM images of (a)  $\text{Fe}_3\text{C}@\text{NSC-800}$ , (b)  $\text{Fe}_3\text{C}@\text{NSC-1000}$ .

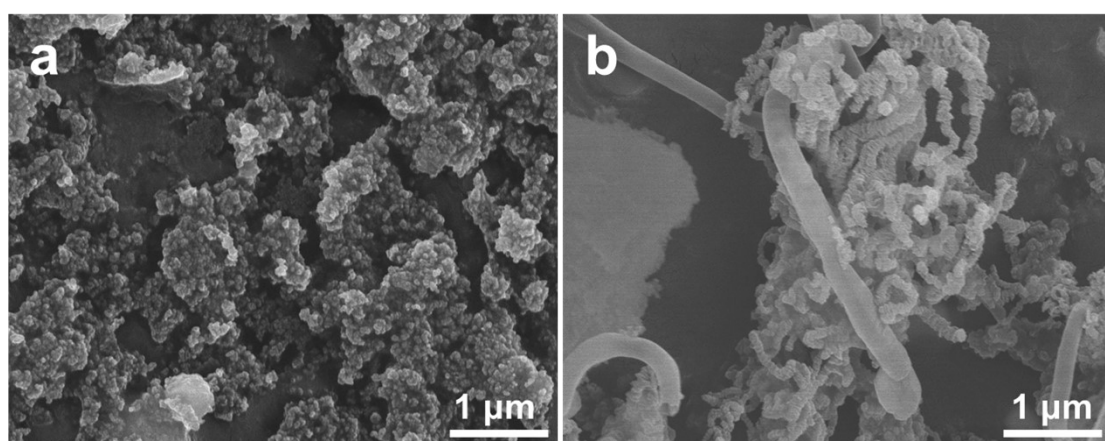

**Fig. S4** SEM images of (a)  $\text{Fe}/\text{KB-900}$  and (b)  $\text{Fe}/\text{MA-900}$ .

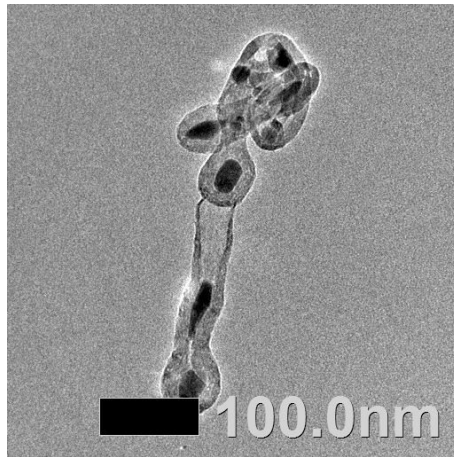

**Fig. S5** TEM image of carbon nanotube in  $\text{Fe}_3\text{C}@NSC-900$ .

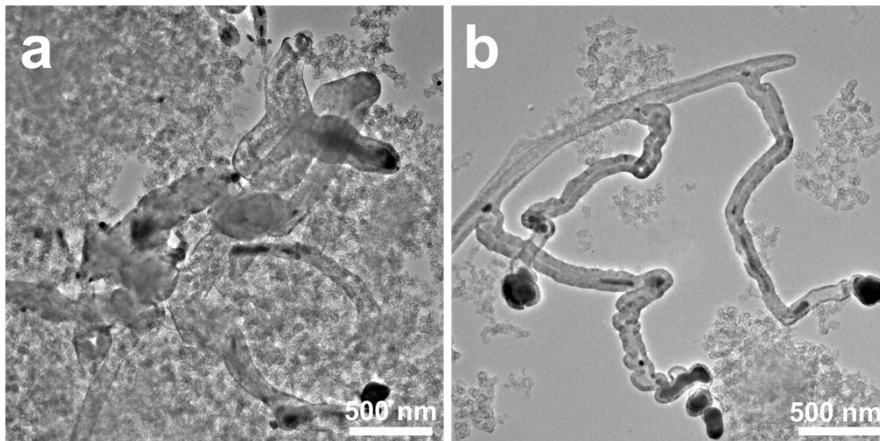

**Fig. S6** TEM images of (a)  $\text{Fe}_3\text{C}@NSC-800$ , (b)  $\text{Fe}_3\text{C}@NSC-1000$ .

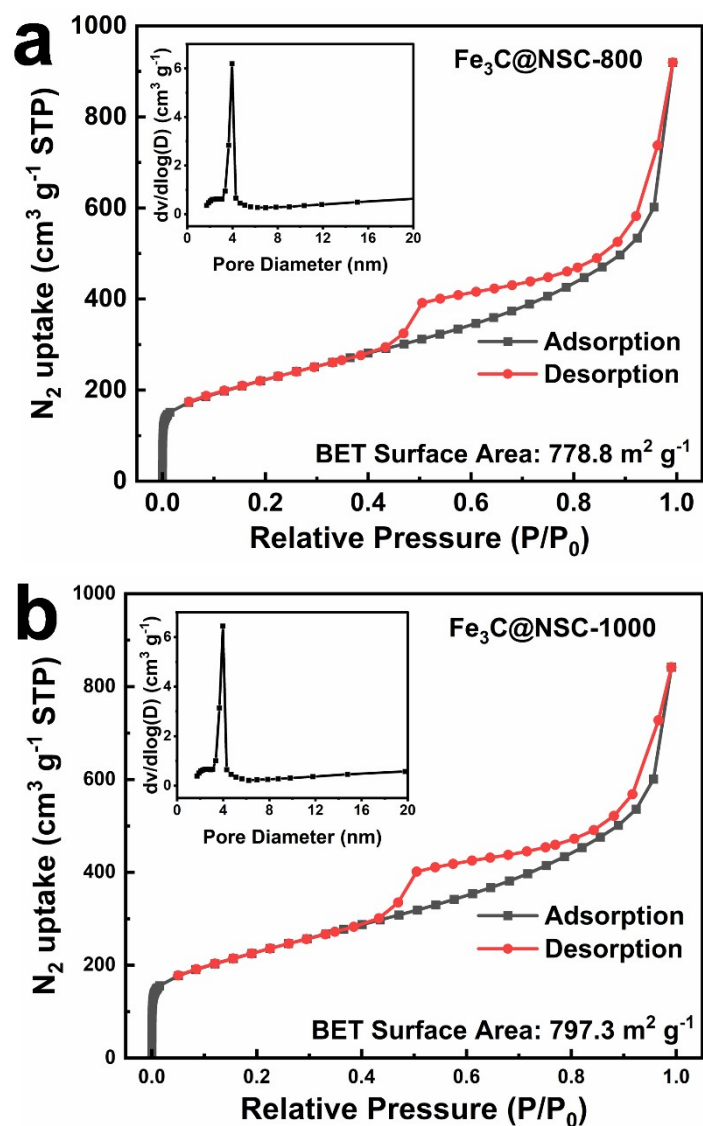

**Fig. S7**  $N_2$  adsorption-desorption isotherms and related pore size distributions for (a)  $Fe_3C@NSC-800$  and (b)  $Fe_3C@NSC-1000$ .



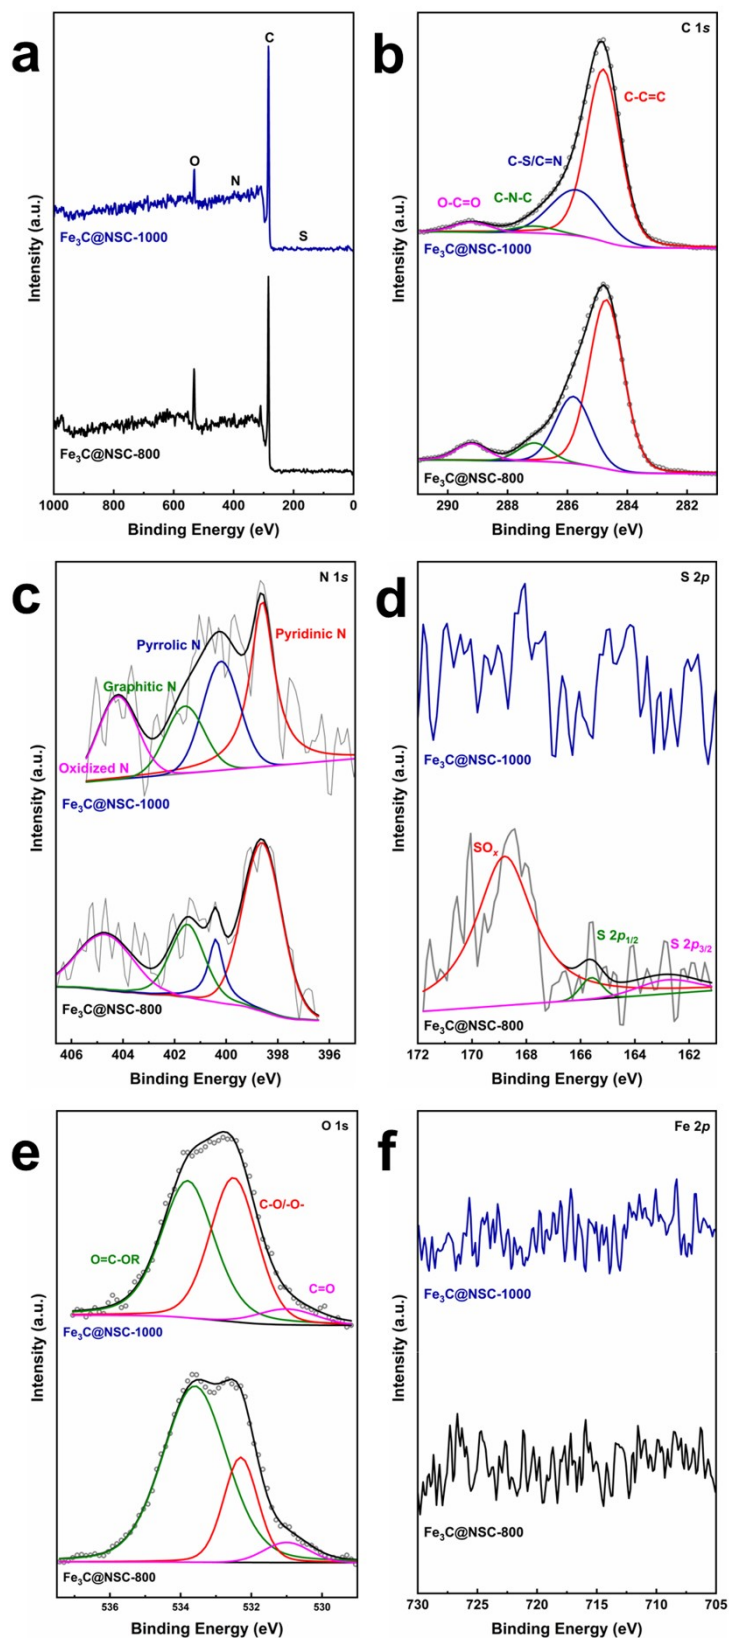

**Fig. S8** (a) Survey XPS spectra; (b) C 1s; (c) N 1s; (d) S 2p; (e) O 1s and (f) Fe 2p high-resolution XPS spectra of Fe<sub>3</sub>C@NSC-800 and Fe<sub>3</sub>C@NSC-1000.

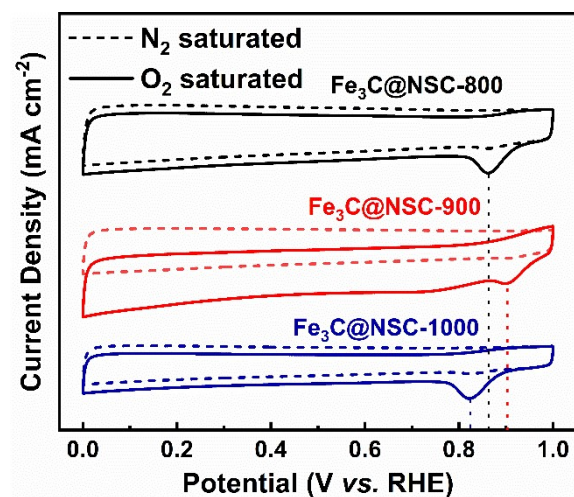

Fig. S9 CV curves of Fe<sub>3</sub>C@NSC-T.

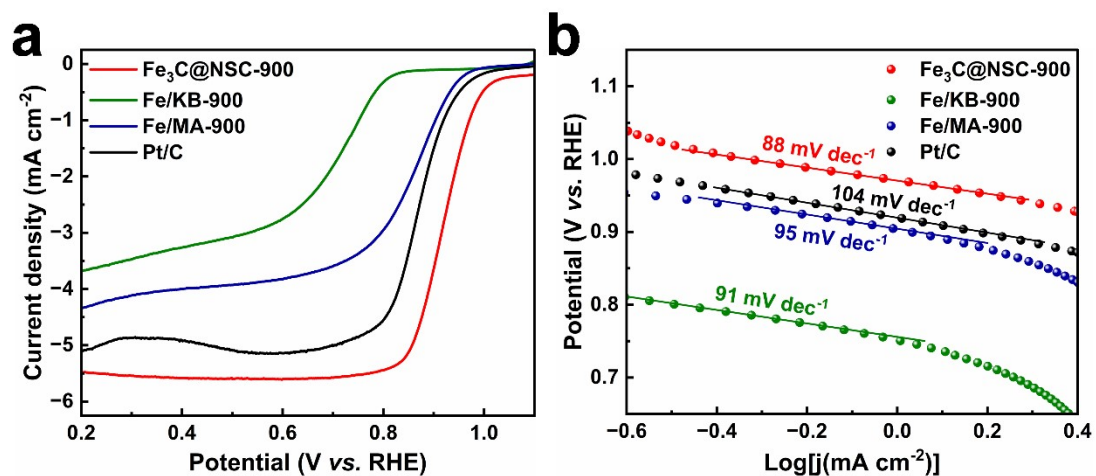

Fig. S10 (a) ORR polarization curves and (b) corresponding Tafel plots for Fe<sub>3</sub>C@NSC-900, Fe/KB-900, Fe/MA-900 and Pt/C on RDE at 1600 rpm.

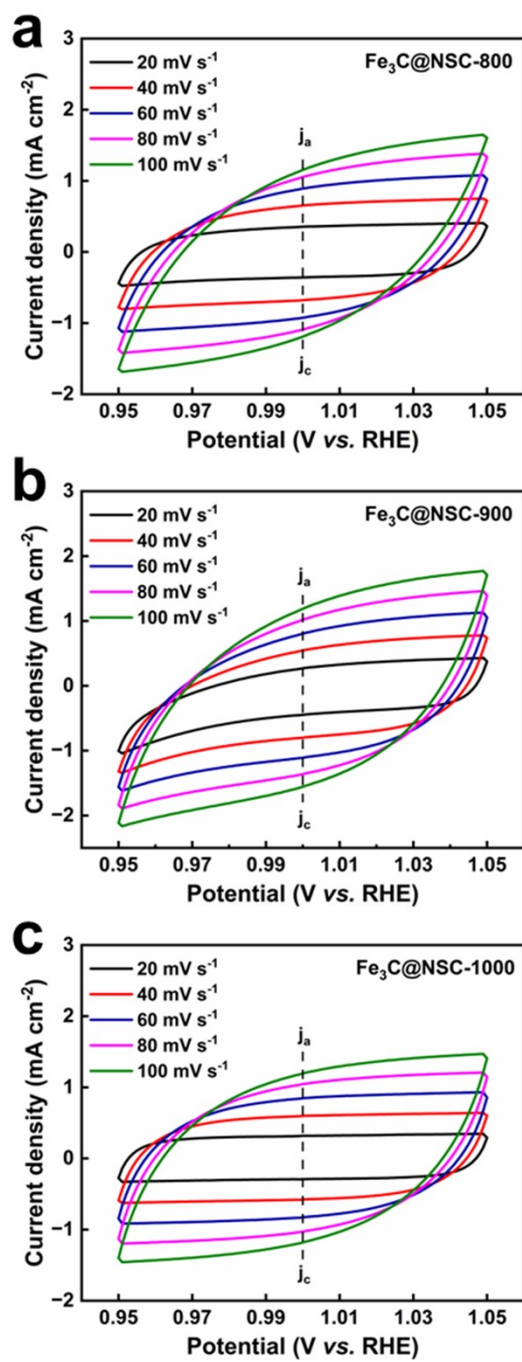

**Fig. S11** (a-c) The cyclic voltammograms curves of Fe<sub>3</sub>C@NSC-T in the region of 0.95-1.05 V vs. RHE in 0.1 M KOH.

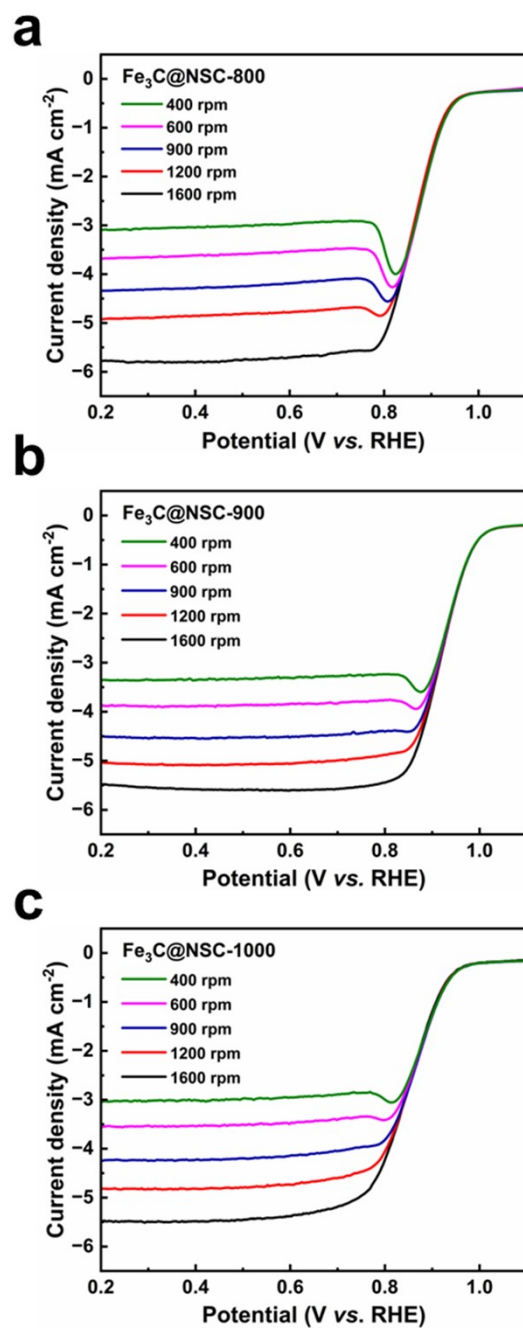

**Fig. S12** (a-c) LSV curves of Fe<sub>3</sub>C@NSC-T at various rotation speeds.

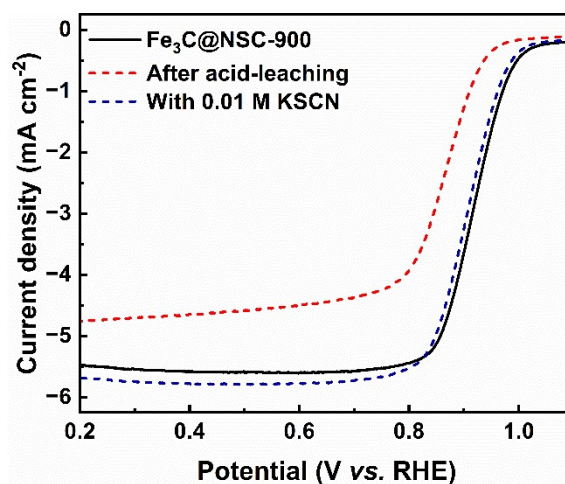

**Fig. S13** LSV curves for ORR before and after acid-leaching and poisoning treatment with 0.01 M KSCN in 0.1 M KOH.

**Table S1** XPS spectra analysis for samples.

| Sample                     | C 1s (%) | N 1s (%) | O 1s (%) | S 2p (%) |
|----------------------------|----------|----------|----------|----------|
| Fe <sub>3</sub> C@NSC-800  | 89.89    | 0.96     | 9.03     | 0.12     |
| Fe <sub>3</sub> C@NSC-900  | 95.64    | 0.86     | 3.35     | 0.14     |
| Fe <sub>3</sub> C@NSC-1000 | 94.29    | 0.76     | 4.95     | --       |

**Table S2** Corresponding contents of different N species for Fe<sub>3</sub>C@NSC-T.

| Sample                     | Pyridinic N | Graphitic N | Pyrrolic N | Oxidized N |
|----------------------------|-------------|-------------|------------|------------|
| Fe <sub>3</sub> C@NSC-800  | 47.9%       | 20.1%       | 10.1%      | 21.9%      |
| Fe <sub>3</sub> C@NSC-900  | 54.0%       | 40.6%       | 3.3%       | 2.1%       |
| Fe <sub>3</sub> C@NSC-1000 | 37.5%       | 16.3%       | 25.2%      | 21.0%      |

**Table S3** Summary of ORR performances of Fe<sub>3</sub>C@NSC-900, 20% Pt/C and recently reported other advanced ORR catalysts under alkaline conditions.

| Samples                                  | Onset potential<br>( $E_0$ )<br>(V vs. RHE) | Half-wave potential<br>( $E_{1/2}$ )<br>(V vs. RHE) | Half-wave potential<br>difference between the<br>sample and Pt/C | Limiting current<br>density ( $J_L$ )<br>(mA cm <sup>-2</sup> ) | Ref.      |
|------------------------------------------|---------------------------------------------|-----------------------------------------------------|------------------------------------------------------------------|-----------------------------------------------------------------|-----------|
| Fe <sub>3</sub> C@NSC-900                | 1.177                                       | 0.922                                               | 0.052                                                            | 5.480                                                           | This work |
| FeS/Fe <sub>3</sub> C@Fe-N-C             | 0.99                                        | 0.91                                                | 0.031                                                            | -                                                               | S2        |
| Fe@MET-M                                 | -                                           | 0.895                                               | 0.027                                                            | 4.909                                                           | S3        |
| Fe <sub>3</sub> C Fe-N-C                 | 0.982                                       | 0.888                                               | 0.035                                                            | 5.165                                                           | S4        |
| Fe <sub>3</sub> C@NPW                    | -                                           | 0.87                                                | 0.020                                                            | 5.19                                                            | S5        |
| NC@Fe <sub>3</sub> C-900                 | 0.98                                        | 0.88                                                | 0.040                                                            | -                                                               | S6        |
| Fe <sub>SA</sub> /N,S-PHLC               | 0.97                                        | 0.91                                                | 0.031                                                            | -                                                               | S7        |
| Fe/Fe <sub>x</sub> C@Fe-N-C-900          | 1.01                                        | 0.91                                                | 0.050                                                            | 5.72                                                            | S8        |
| FeN <sub>4</sub> -Fe <sub>NCP</sub> @MCF | 1.02                                        | 0.894                                               | 0.029                                                            | -                                                               | S9        |
| Ni <sub>3</sub> Fe-NCNTs-800             | 0.980                                       | 0.862                                               | 0.019                                                            | 6.606                                                           | S10       |
| Fe <sub>SA</sub> /AC@HNC                 | 0.99                                        | 0.90                                                | 0.040                                                            | -                                                               | S11       |

---

|                                            |       |       |       |      |     |
|--------------------------------------------|-------|-------|-------|------|-----|
| Co <sub>40</sub> SAs/AC@NG                 | 0.980 | 0.890 | 0.042 | -    | S12 |
| FeCo-NSC                                   | -     | 0.86  | 0.010 | 5.26 | S13 |
| FeMn <sub>ac</sub> /Mn-N <sub>4</sub> C    | 1.00  | 0.90  | -     | 5.55 | S14 |
| FePc@CeO/NSCNF                             | 1.00  | 0.89  | 0.030 | -    | S15 |
| Co <sub>1</sub> /Zn <sub>20</sub> -N-C-200 | -     | 0.89  | 0.020 | 5.78 | S16 |
| Ni,Fe-DSAs/NCs                             | -     | 0.895 | 0.030 | -    | S17 |
| Co SAs/3D GFs                              | 1.032 | 0.901 | 0.066 | -    | S18 |
| Co,Zn SAs@Co-CNTs                          | 1.02  | 0.92  | 0.05  | -    | S19 |
| Co <sub>2</sub> MnN <sub>8</sub> /C        | 1.027 | 0.912 | 0.02  | -    | S20 |

---

## References

- S1. P. H. Dinolfo, M. E. Williams, C. L. Stern and J. T. Hupp, *J. Am. Chem. Soc.*, 2004, **126**, 12989-13001.
- S2. S. Sun, F. Yang, X. Zhang, J. Qian, K. Wei, J. An, Y. Sun, S. Wang, X. Li and Y. Li, *Chem. Eng. J.*, 2024, **487**, 150673.
- S3. G. Li, J. Liu, C. Xu, H. Chen, H. Hu, R. Jin, L. Sun, H. Chen, C. Guo, H. Li and Y. Si, *Energy Storage Mater.*, 2023, **56**, 394-402.
- S4. Y. Chen, X. Kong, Y. Wang, H. Ye, J. Gao, Y. Qiu, S. Wang, W. Zhao, Y. Wang, J. Zhou and Q. Yuan, *Chem. Eng. J.*, 2023, **454**, 140512.
- S5. M. Cao, Y. Liu, K. Sun, H. Li, X. Lin, P. Zhang, L. Zhou, A. Wang, S. Mehdi, X. Wu, J. Jiang and B. Li, *Small*, 2022, **18**, 2202014.
- S6. J. Q.-Bermejo, A. Daouli, S. G. Dalí, Y. Cui, A. Zitolo, J. C.-Gutiérrez, M. Emo, M. T. Izquierdo, W. Mustain, M. Badawi, A. Celzard and V. Fierro, *Adv. Funct. Mater.*, 2024, **34**, 2403810.
- S7. M. Yuan, Y. Liu, Y. Du, Z. Xiao, H. Li, K. Liu and L. Wang, *Adv. Funct. Mater.*, 2024, **34**, 2401484.
- S8. M. Chen, F. Kong, H. Yao, Y. Chen, G. Meng, Z. Chang, C. Chen, H. Tian, L. Wang, X. Cui and J. Shi, *Chem. Eng. J.*, 2023, **453**, 139820.
- S9. Z. Wang, Z. Lu, Q. Ye, Z. Yang, R. Xu, K. Kong, Y. Zhang, T. Yan, Y. Liu, Z. Pan, Y. Huang and X. Lu, *Adv. Funct. Mater.*, 2024, **34**, 2315150.
- S10. Q. Yan, X. Duan, Y. Liu, F. Ge and H. Zheng, *J. Mater. Chem. A*, 2023, **11**, 1430-1438.
- S11. H. Zhang, H.-C. Chen, S. Feizpoor, L. Li, X. Zhang, X. Xu, Z. Zhuang, Z. Li, W. Hu, R. Snyders, D. Wang and C. Wang, *Adv. Mater.*, 2024, **36**, 2400523.
- S12. M. Zhang, H. Li, J. Chen, F.-X. Ma, L. Zhen, Z. Wen and C.-Y. Xu, *Adv. Funct. Mater.*, 2023, **33**, 2209726.
- S13. Y. Wu, C. Ye, L. Yu, Y. Liu, J. Huang, J. Bi, L. Xue, J. Sun, J. Yang, W. Zhang, X. Wang, P. Xiong and J. Zhu, *Energy Storage Mater.*, 2022, **45**, 805-813.
- S14. H. Liu, L. Jiang, J. Khan, X. Wang, J. Xiao, H. Zhang, H. Xie, L. Li, S. Wang and L. Han, *Angew. Chem. Int. Ed.*, 2023, **62**, e202214988.



- S15.S. Tao, S. Xiang, Y. Yu, H. Lan, C. Liu and J. Zhang, *Carbon*, 2024, **220**, 118893.
- S16.Y. Zhang, X. Yu Gao, Z. Wen, C. Cheng Yang and Q. Jiang, *Chem. Eng. J.*, 2022, **446**, 137441.
- S17.Z. Wang, X. Jin, R. Xu, Z. Yang, S. Ma, T. Yan, C. Zhu, J. Fang, Y. Liu, S.-J. Hwang, Z. Pan and H. J. Fan, *ACS Nano*, 2023, **17**, 8622-8633.
- S18.H. Zhou, T. Yang, Z. Kou, L. Shen, Y. F. Zhao, Z. Wang, X. Wang, Z. Yang, J. Du, J. Xu, M. Chen, L. Tian, W. Guo, Q. Wang, H. Lv, W. Chen, X. Hong, J. Luo, D. He and Y. Wu, *Angew. Chem. Int. Ed.*, 2020, **59**, 20645-20649.
- S19.L. Feng, M. Zhou, D. He, H. Yin, Y. Huang, L. Cao, Y. Fang, D. Chu, Y. Liu, H. Chen, G. Li, J. Huang, *Chem. Eng. J.*, 2024, **496**, 154255.
- S20.X. Yan, D. Liu, P. Guo, Y. He, X. Wang, Z. Li, H. Pan, D. Sun, F. Fang and R. Wu, *Adv. Mater.*, 2023, **35**, 2210975.
